# Supplementary material for: Characterization of Neurons Expressing the Novel Analgesic Drug Target Somatostatin Receptor 4 in Mouse and Human Brains
Source: PubMed Central journal article supplement (PMC7589422; doi:10.3390/ijms21207788), 2020-10-21
Supplement: ijms-21-07788-s001.pdf [file ijms-21-07788-s001.pdf]

### Supplementary Materials for Characterization of neurons expressing the novel analgesic drug target somatostatin receptor 4 in mouse and human brains

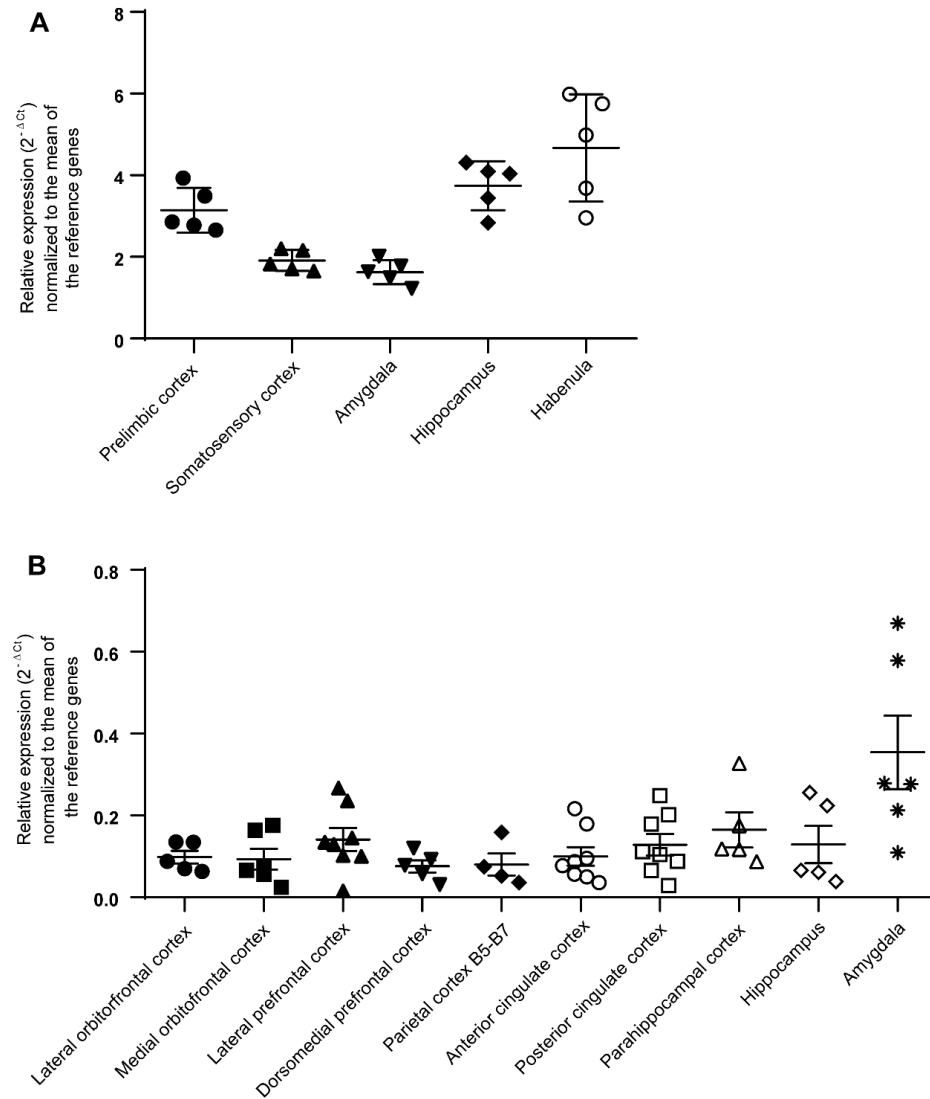

**Figure S1.** Relative mouse and human *Sstr4/SSTR4* mRNA were detected in various mouse brain micropunches (A) and human post-mortem cortical tissues (B) by RT-qPCR. Scattered dot plots represent SEM of  $N = 5$  mouse and 4–8 human brain samples obtained from each brain areas. All qPCR experiments were performed in technical replicates. The geometric mean of the reference gene Ct values was determined and *Sstr4/SSTR4* mRNA expression relative to the reference genes (mouse *Gus* and *Hmbs*, and human *POLR2A*, *PES1* and *IPO8*) were calculated using the  $2^{-\Delta Ct}$  formula to compare different brain regions.

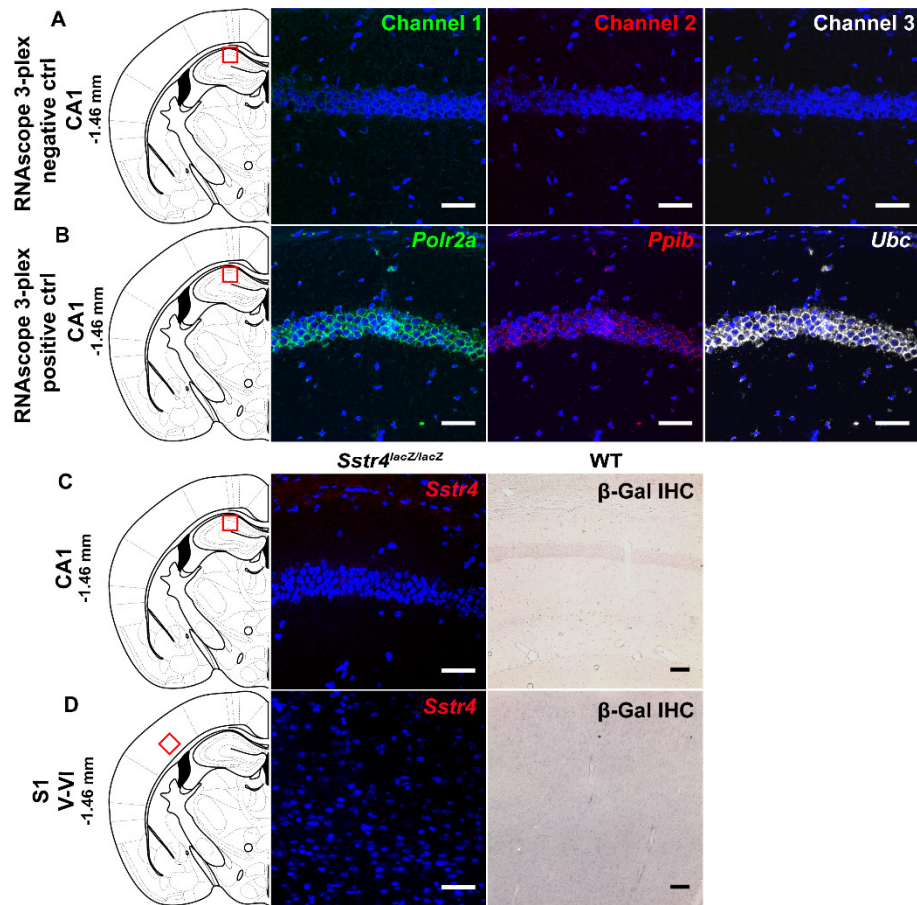

**Figure S2.** Representative control conditions for the mouse histological studies (by RNAscope counterstained with DAPI and  $\beta$ -Gal immunohistochemistry (IHC)). RNAscope 3-plex negative control specific to bacterial *dabP* gene are shown in the CA1 (A) from WT mice ( $N = 2$ ). RNAscope 3-plex positive control probes specific to mouse *Polr2a*, *Ppib* and *Ubc* mRNA targets shown in green, red and white, respectively in the CA1 of the hippocampus (CA1, B) from WT animals ( $N = 2$ ). No *Sstr4* signal is detectable either in the CA1 (C, left panel) or in the primary somatosensory cortex (S1, D, left panel) from *Sstr4*<sup>lacZ/lacZ</sup> mice by RNAscope ( $N = 2$ ). Similarly, no *lacZ* signal is depicted either in the CA1 (C, right panel) or in the S1 (D, right panel) from WT mice by  $\beta$ -Gal IHC ( $N = 2$ ). Scale bar: 50  $\mu$ m.

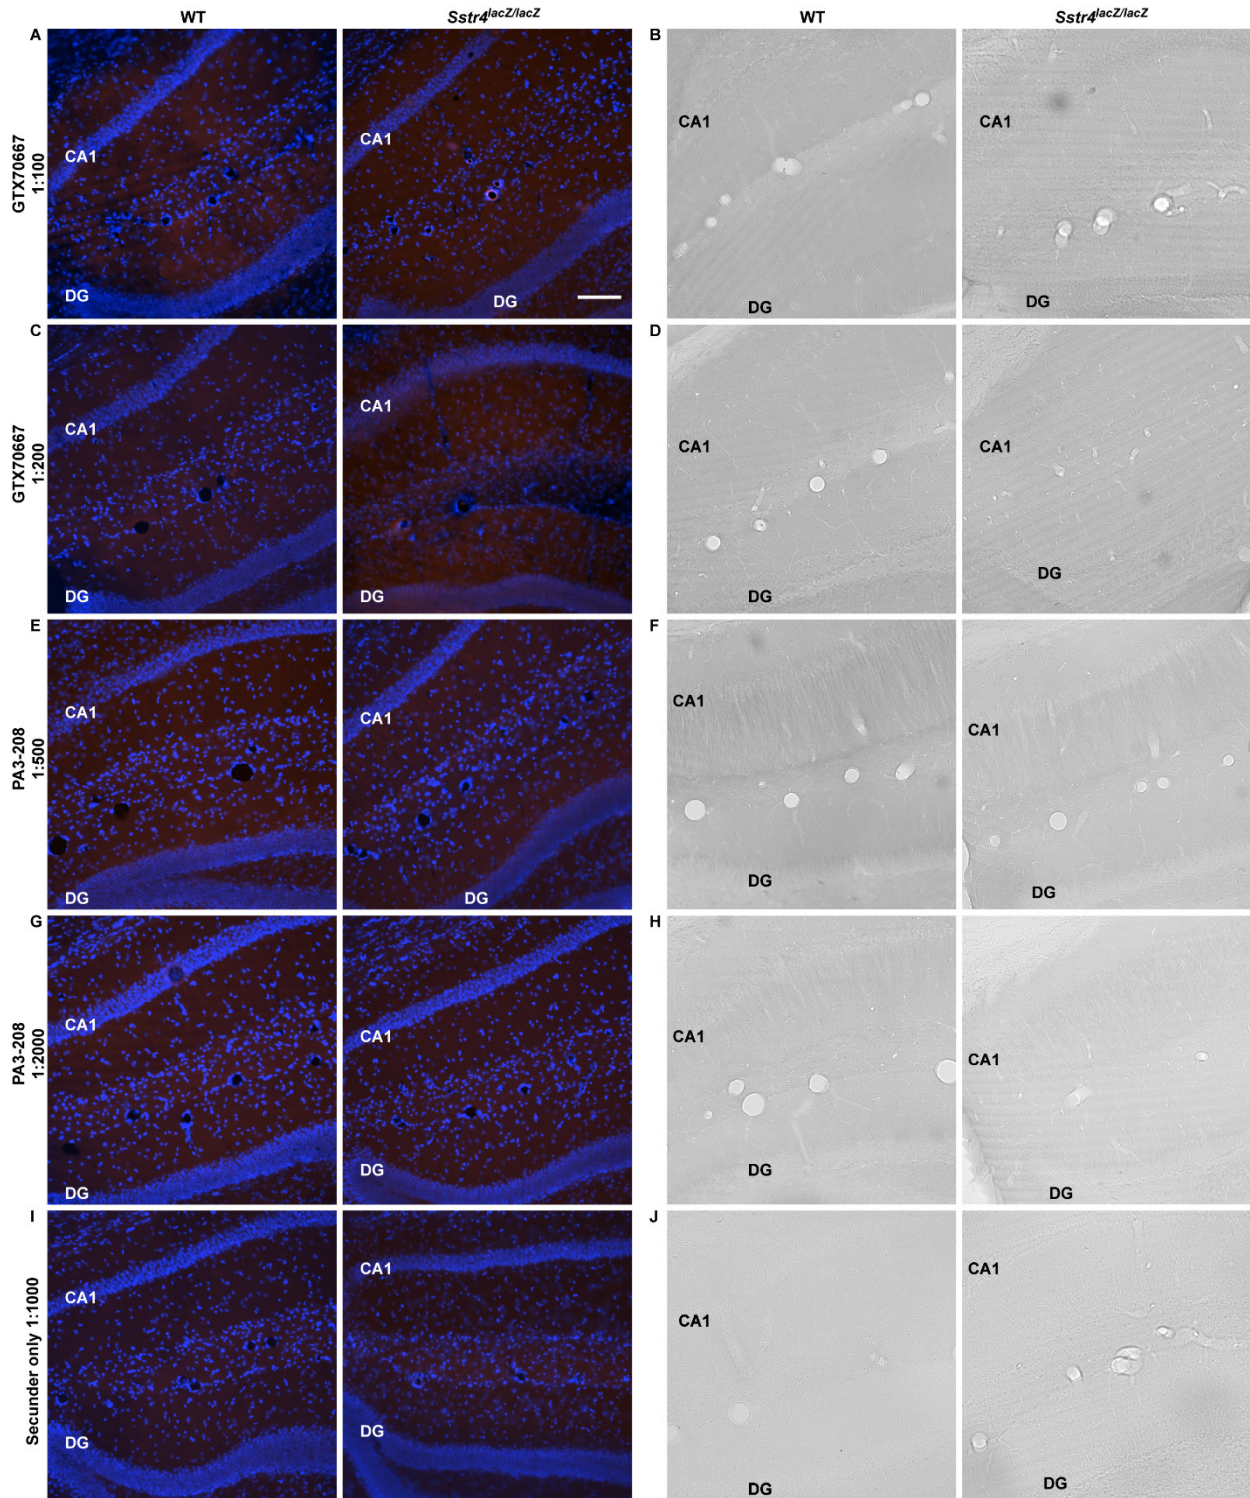

**Figure S3.** Representative images of IF and DAB-IHC staining on coronal sections (Bregma  $-1.4$  mm) from C57BL6/J and *Sstr4<sup>lacZ/lacZ</sup>* mice ( $n = 2$ ). **A–B**, sections were incubated with 1:100 diluted GTX70667 (GeneTex) anti-SST<sub>4</sub> antibody. **C–D**, sections were incubated with 1:200 diluted GTX70667 anti-SST<sub>4</sub> antibody. **E–F**, sections were incubated with 1:500 diluted PA3-208 (Thermo Fisher Scientific) anti-SST<sub>4</sub> antibody. **G–H**, sections were incubated with 1:2000 diluted PA3-208 anti-SST<sub>4</sub> antibody. **I**, sections were incubated with 1:1000 diluted goat anti-rabbit IgG secondary antibody

conjugated to Alexa Fluor 594 (A-11012, Thermo Fischer Scientific), no primary antibody control. **J**, sections were incubated with 1:200 diluted biotinylated goat anti-rabbit antibody, DAB signal was ABC method-amplified, no primary antibody control. Scale bar is 50  $\mu\text{m}$ , same magnification was used on every image.

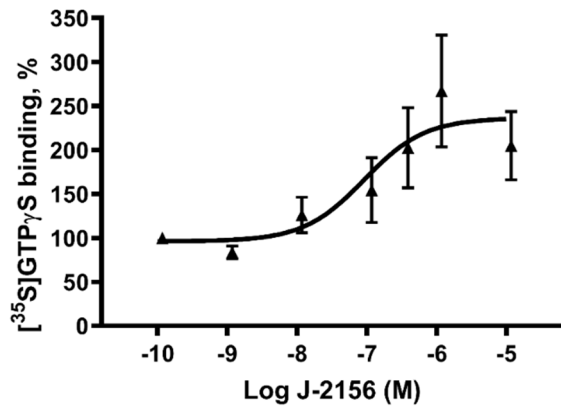

**Figure S4.** Effect of J-2156 on SST<sub>4</sub> receptor-linked G-protein activation. [<sup>35</sup>S]GTP<sub>γ</sub>S binding induced by J-2156 in CHO cells stably expressing the human SST<sub>4</sub> receptor. Each data point represents the mean $\pm$ SEM of  $n = 3$  experiments.

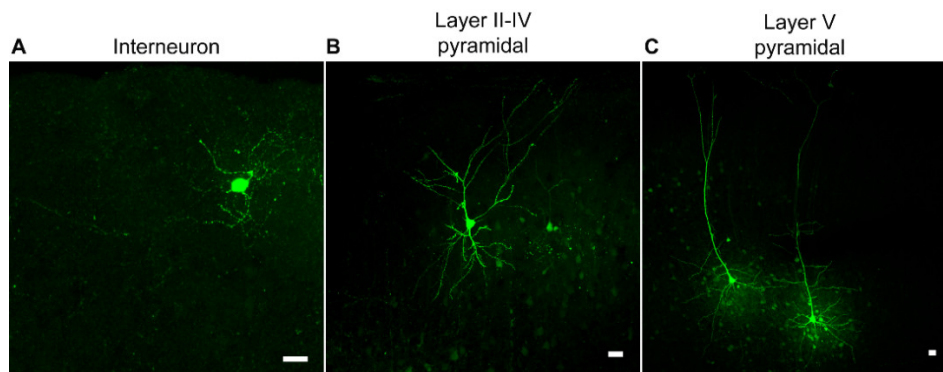

**Figure S5.** Biocytin filled and patch clamp recorded neurons from different layers of the somatosensory cortex. Representative confocal images of biocytin-filled interneuron (**A**), layer II–IV (**B**) and layer V pyramidal neurons (**C**) of the somatosensory cortex. Scale bar: 20  $\mu\text{m}$ .

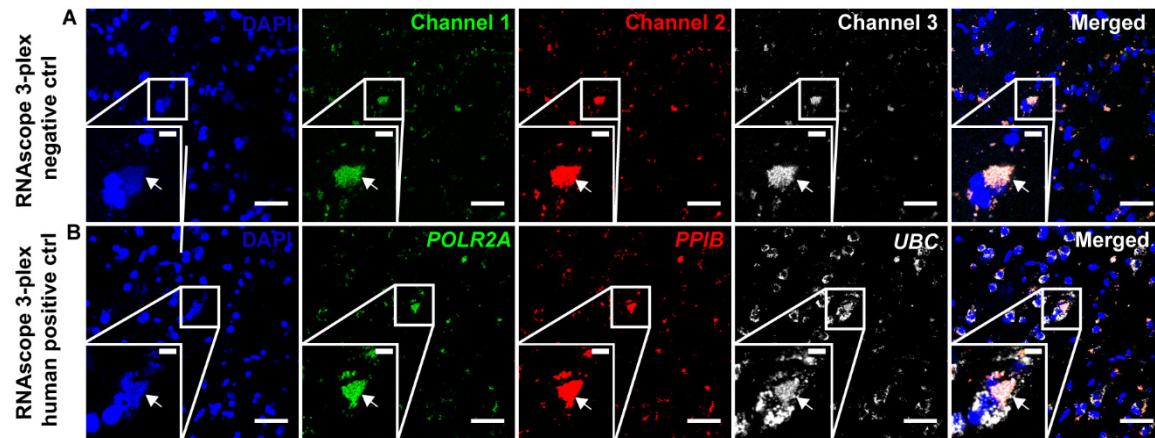

**Figure S6.** Representative control conditions for layer V pyramidal neurons of human neurosurgical cortical sample taken from the left middle temporal gyrus (by multiplex fluorescent RNAscope ISH). RNAscope 3-plex negative control probes specific to bacterial *dabP* gene (A) and RNAscope 3-plex positive control probes (B) specific to human *POLR2A* (green), *PPIB* (red) and *UBC* (white) mRNA targets are shown in layer V pyramidal neurons from Patient A ( $N = 1$ ). Note that the tissue contains considerable amount of lipofuscin that shows some autofluorescence in all examined channels (arrows). Scale bar: 50  $\mu\text{m}$ , inset scale bar: 10  $\mu\text{m}$ .

| Patient | Gender | Age | Post-mortem delay (h) | Died in                       | Others            | Brain area                                                                                                                                                                                    |
|---------|--------|-----|-----------------------|-------------------------------|-------------------|-----------------------------------------------------------------------------------------------------------------------------------------------------------------------------------------------|
| 1       | male   | 42  | 3.5                   | Cardiac insufficiency         |                   | Posterior cingulate cortex<br>Parahippocampal cortex<br>Hippocampus                                                                                                                           |
| 2       | female | 79  | 4.5                   | Cardiac insufficiency         |                   | Parietal cortex B5-B7<br>Posterior cingulate cortex<br>Hippocampus                                                                                                                            |
| 3       | male   | 66  | 4.5                   | Cardio-pulmonal insufficiency | Leukemia          | Parahippocampal cortex<br>Amygdala                                                                                                                                                            |
| 4       | female | 48  | 5                     | Cardiac insufficiency         |                   | Lateral orbitofrontal cortex<br>Lateral prefrontal cortex<br>Anterior cingulate cortex suprag<br>Posterior cingulate cortex<br>Amygdala                                                       |
| 5       | male   | 52  | 4.5                   | Cardiac insufficiency         |                   | Lateral orbitofrontal cortex<br>Medialis orbitofrontal cortex<br>Lateral prefrontal cortex<br>Anterior cingulate cortex suprag<br>Posterior cingulate cortex<br>Dorsomedial prefrontal cortex |
| 6       | female | 44  | 5                     | Cardiac insufficiency         | Arterio-sclerosis | Parietal cortex B5-B7<br>Posterior cingulate cortex                                                                                                                                           |

| Patient | Gender | Age | Post-mortem delay (h) | Died in                | Others   | Brain area                                                                                                                                                                      |
|---------|--------|-----|-----------------------|------------------------|----------|---------------------------------------------------------------------------------------------------------------------------------------------------------------------------------|
| 7       | male   | 53  | 5                     | Pulmonal insufficiency |          | Parahippocampal cortex                                                                                                                                                          |
| 8       | male   | 63  | 3.5                   | Pulmonal insufficiency |          | Lateral orbitofrontal cortex<br>Dorsomedial prefrontal cortex<br>Anterior cingulate cortex<br>supragenulate<br>Posterior cingulate cortex<br>Parahippocampal cortex<br>Amygdala |
| 9       | male   | 61  | 5                     | Cardiac insufficiency  | Diabetes | Medialis orbitofrontal cortex<br>Lateral prefrontal cortex<br>Dorsomedial prefrontal cortex<br>Posterior cingulate cortex<br>Anterior cingulate cortex suprag                   |
| 10      | male   | 27  | 8                     | Pulmonal insufficiency |          | Lateral orbitofrontal cortex<br>Lateral prefrontal cortex<br>Anterior cingulate cortex suprag<br>Hippocampus<br>Amygdala                                                        |
| 11      | female | 26  | 6.5                   | Cardiac insufficiency  |          | Medialis orbitofrontal cortex<br>Anterior cingulate cortex suprag<br>Hippocampus<br>Lateral prefrontal cortex<br>Parietal cortex<br>B5-B7                                       |

| Patient | Gender | Age | Post-mortem delay (h) | Died in                       | Others            | Brain area                                                                                                                                                                                      |
|---------|--------|-----|-----------------------|-------------------------------|-------------------|-------------------------------------------------------------------------------------------------------------------------------------------------------------------------------------------------|
| 12      | male   | 50  | 5.5                   | Stroke                        |                   | Hippocampus                                                                                                                                                                                     |
| 13      | male   | 55  | 2                     | Cardio-pulmonal insufficiency |                   | Medialis orbitofrontal cortex<br>Lateral prefrontal cortex<br>Dorsomedial prefrontal cortex<br>Parietal cortex<br>B5-B7<br>Amygdala                                                             |
| 14      | male   | 68  | 10                    | Cardiac insufficiency         | Arterio-sclerosis | Medialis orbitofrontal cortex<br>Anterior cingulate cortex suprag                                                                                                                               |
| 15      | female | 72  |                       | Cardio-pulmonal insufficiency | Arterio-sclerosis | Medialis orbitofrontal cortex<br>Lateral orbitofrontal cortex<br>Lateral prefrontal cortex<br>Dorsomedial prefrontal cortex<br>Posterior cingulate cortex<br>Parahippocampal cortex<br>Amygdala |

**Table S1.** Medical history of human patients (post-mortem samples)



| Gene amplified          | Nucleotide sequence of primer                        | Primer type | Product length in bp | NCBI RefSeq    |
|-------------------------|------------------------------------------------------|-------------|----------------------|----------------|
| <b>SYBR</b>             |                                                      |             |                      |                |
| <b>Mm <i>Gus</i></b>    | CCGACCTCTCGAACAACCG                                  | sense       | 169                  | NM_001357027.1 |
|                         | GCTTCCCCTTCATACCACACC                                | antisense   |                      |                |
| <b>Mm <i>Hmbs</i></b>   | ATGAGGGTGATTTCGAGTGGG                                | sense       | 134                  | NM_013551.2    |
|                         | TTGTCTCCCGTGGTGGACATA                                | antisense   |                      |                |
| <b>Mm <i>Sstr4</i></b>  | GCCCTGGTCATCTTCGTGAT                                 | sense       | 95                   | NM_009219.3    |
|                         | ATGAAGAGCTCATCGGCGAC                                 | antisense   |                      |                |
| <b>PROBE</b>            |                                                      |             |                      |                |
| <b>Hs <i>PES1</i></b>   | AGCGCCTGGCCATTATGA                                   | sense       | 75                   | NM_001282327.1 |
|                         | TTCGCCTCTTGCCAAACA                                   | antisense   |                      |                |
|                         | /56-FAM/ AGCGGGAGA/ ZEN/<br>AGTACCTGTACCAGA/3IABkFQ/ | probe       |                      |                |
| <b>Hs <i>IPO8</i></b>   | ACCTTTGAAAACAAAGGAGTCC                               | sense       | 96                   | NM_001190995.1 |
|                         | GCGATGACATTTGGTCAGCT                                 | antisense   |                      |                |
|                         | /5HEX/TTTCCTTCA/ZEN/GTTGTT<br>GCTGGGCAC/3IABkFQ/     | probe       |                      |                |
| <b>Hs <i>POLR2A</i></b> | CCCCCAAAGGCTCAACCTAC                                 | sense       | 83                   | NM_000937.5    |
|                         | GATAGCCGGGCTTGTGAGAC                                 | antisense   |                      |                |
|                         | /5Cy5/TGTTTCCTGCACATGTTTG<br>GCAGC/3IAbRQSp/         | probe       |                      |                |
| <b>Hs <i>SSTR4</i></b>  | TGGAAGGTGCTGGAGGT                                    | sense       | 126                  | NM_001052.2    |
|                         | GTTCTGGTTGCAGGGCTT                                   | antisense   |                      |                |
|                         | /5Cy5/TGGACTACTATGCCACTGC<br>TCTCAAGA/3IAbRQSp/      | probe       |                      |                |

Table S2. Primers used to amplify target loci for RT-qPCR

| Target                              | Catalog number | Fluorophores                   | Fluorophore dilution |
|-------------------------------------|----------------|--------------------------------|----------------------|
| Mm <i>Sstr4</i>                     | 416641-C2      | TSA Plus Cy3                   | 1:750                |
| Hs <i>SSTR4</i>                     | 312851-C2      | TSA Plus Cy3                   | 1:750                |
| Mm <i>Vglut1</i> ( <i>Slc17a7</i> ) | 416631         | TSA Plus Fluorescein           | 1:3000               |
| Hs <i>VGLUT1</i> ( <i>SLC17A7</i> ) | 415611         | TSA Plus Fluorescein           | 1:1500               |
| Mm <i>Chat</i>                      | 408731         | TSA Plus Fluorescein           | 1:1500               |
| Mm <i>Gad1</i>                      | 400951-C3      | TSA Plus Cy5                   | 1:3000               |
| Mm <i>Rbfox3</i> ( <i>NeuN</i> )    | 313311-C3      | TSA Plus Cy5                   | 1:750                |
| Mm-3-plex Positive Control Probe    | 320881         | TSA Plus Fluorescein, Cy3, Cy5 | 1:750                |
| Hs-3-plex Positive Control Probe    | 320861         | TSA Plus Fluorescein, Cy3, Cy5 | 1:750                |
| 3-plex Negative Control Probe       | 320871         | TSA Plus Fluorescein, Cy3, Cy5 | 1:750                |

Mm-Mus musculus, Hs- Homo sapiens

Table S3. RNAscope probes

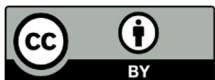

© 2020 by the authors. Licensee MDPI, Basel, Switzerland. This article is an open access article distributed under the terms and conditions of the Creative Commons Attribution (CC BY) license (<http://creativecommons.org/licenses/by/4.0/>).
